# Supplementary material for: A portable test strip fabricated of luminescent lanthanide-functionalized metal–organic frameworks for rapid and visual detection of tetracycline antibiotics
Source: Royal Society of Chemistry journal article supplement (doi:10.1039/d3ay01169k), 2023-01-01
Supplement: d3ay01169k1.pdf [file d3ay01169k1.pdf]

## **Electronic Supporting Information**

*For*

**A portable test strip fabricated of luminescence lanthanide-functionalized metal-organic frameworks for rapid and visual detection of tetracycline antibiotics**

Tingxia Li, Zhongxiu Chen, Zhongshuai Zhao, and Zhongde Liu\*

*Key Laboratory of Luminescence and Real-Time Analytical Chemistry (Southwest University), Education Ministry, College of Pharmaceutical Sciences, Southwest University, Chongqing 400715, China.*

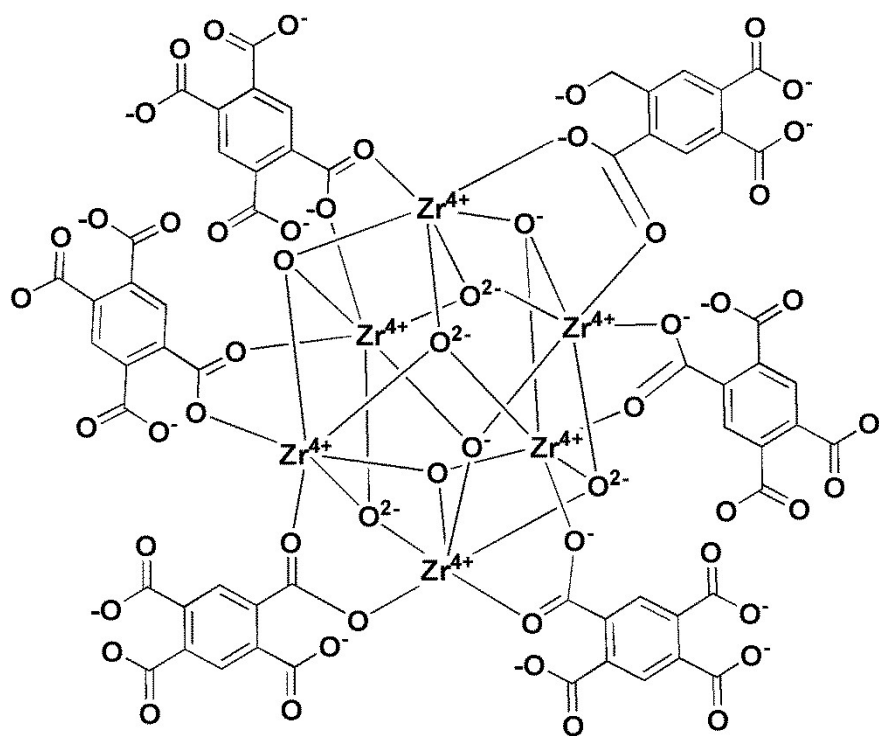

**Figure S1** Structural formula of UiO-66-(COOH)<sub>2</sub>.

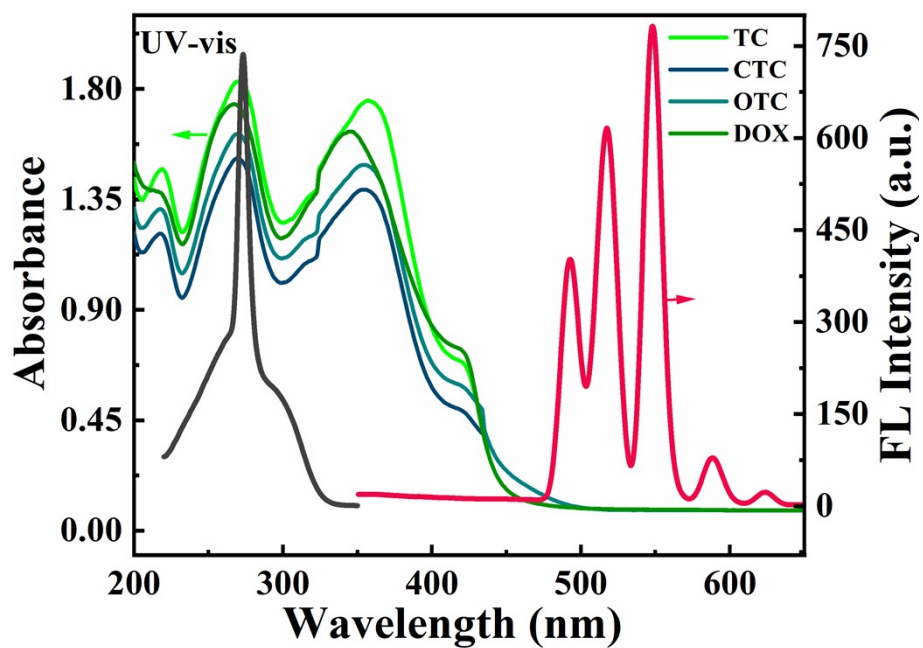

**Figure S2** The UV-vis absorption spectra of the tetracycline antibiotics and the excitation and emission spectra of the ATUC.

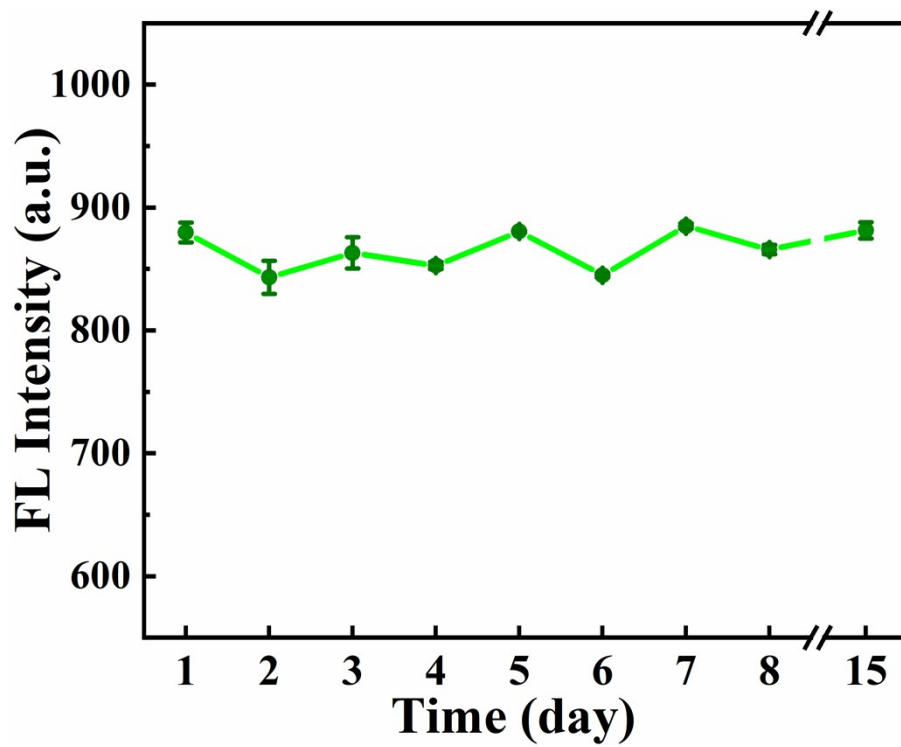

**Figure S3** The long term stability of the luminescence property of the ATUC.

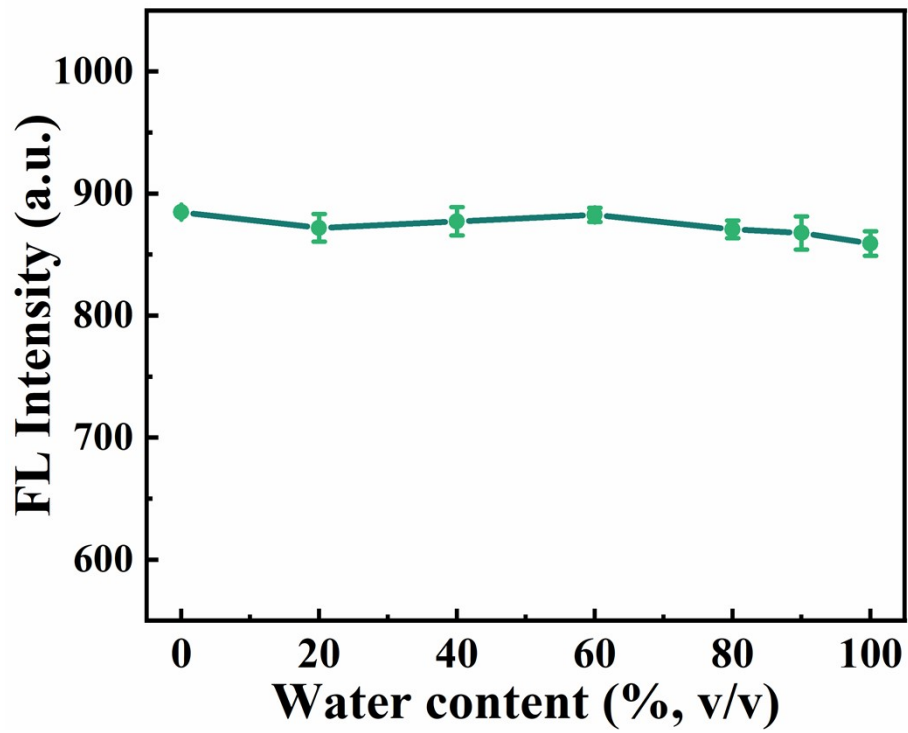

**Figure S4** Effect of the different water content exposure on luminescence intensity of the ATUC MOFs.

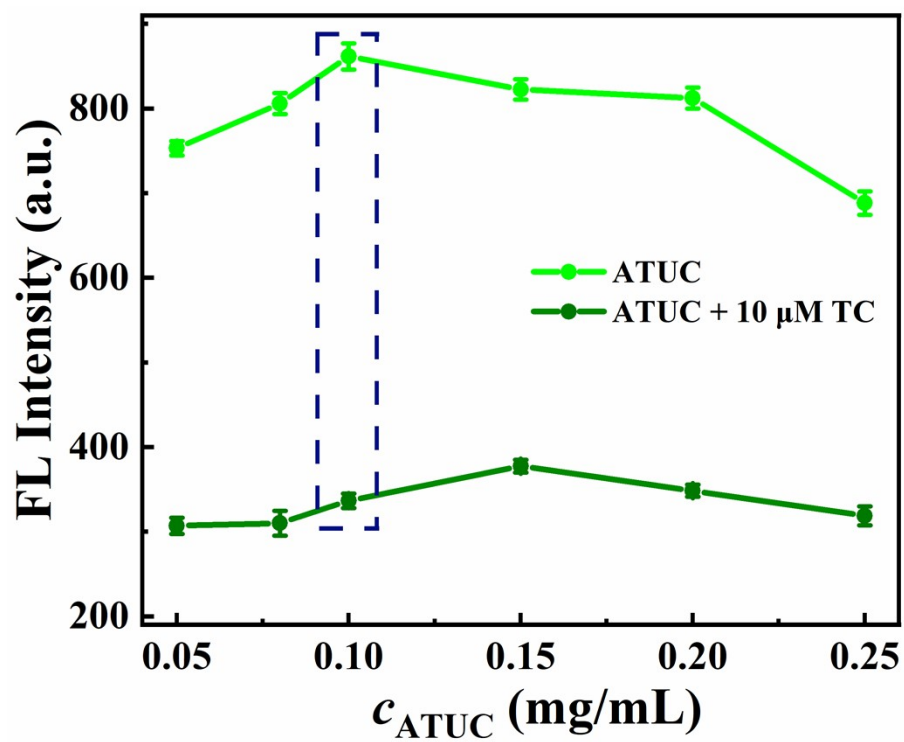

**Figure S5** Effect of the probe concentration on luminescence intensity of ATUC in the absence (light green curve) and presence (dark green curve) of the TC.

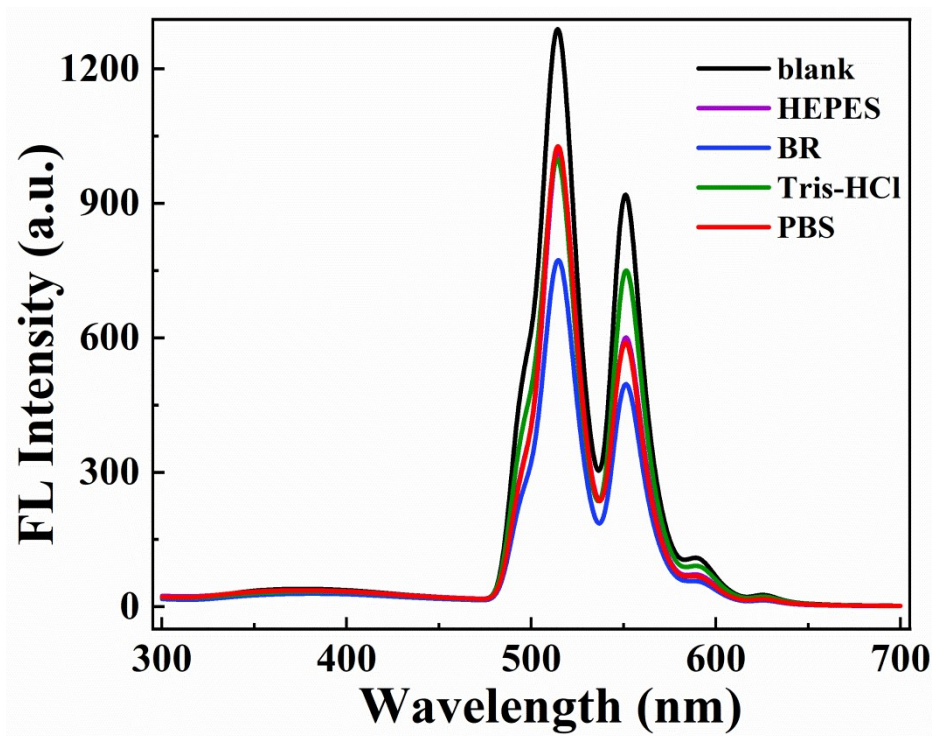

**Figure S6** Effect of the type of buffer solution on the luminescence intensity of the ATUC. Concentration of the ATUC, 0.1 mg/mL.

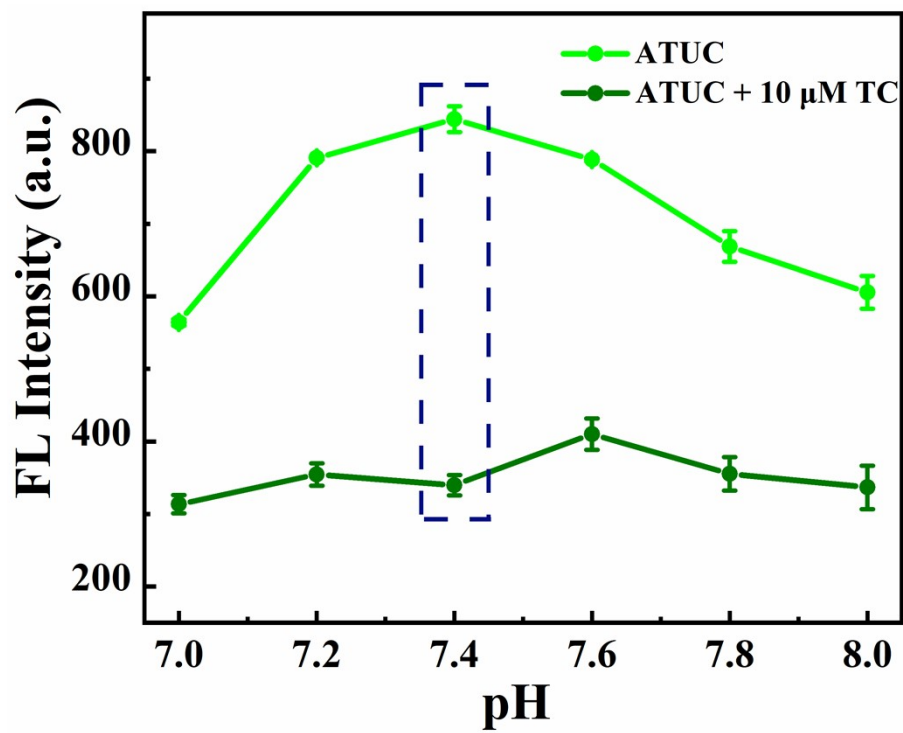

**Figure S7** Effect of pH on the luminescence intensity of the ATUC in the absence (light green curve) and presence TC (dark green curve). Concentration of the ATUC, 0.1 mg/mL.



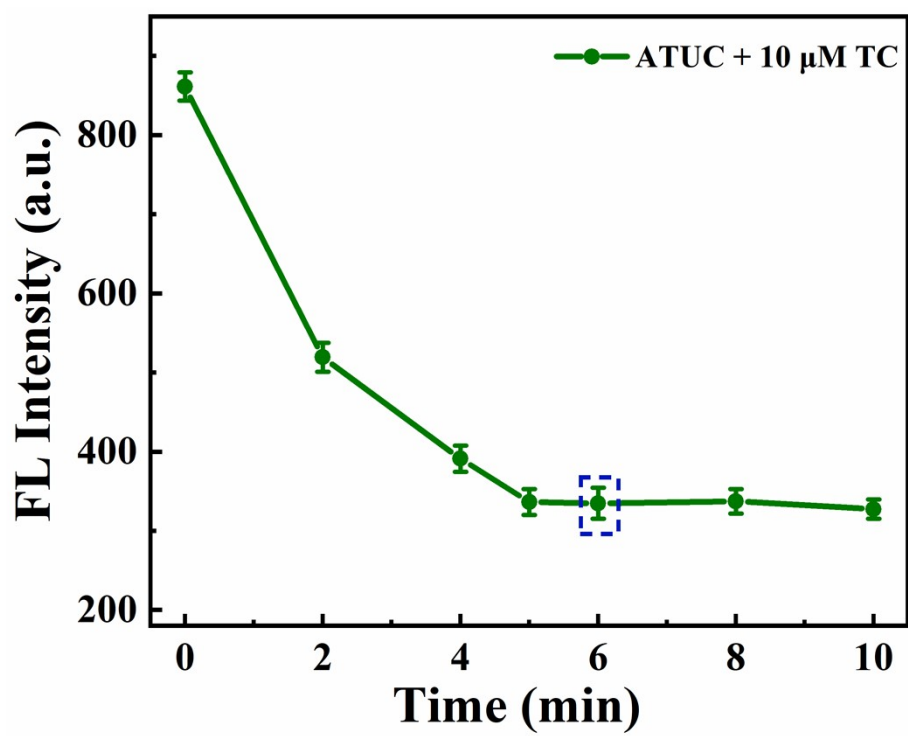

**Figure S8** Optimization of the incubation time between the ATUC and the TC. Concentration of the ATUC, 0.1 mg/mL.

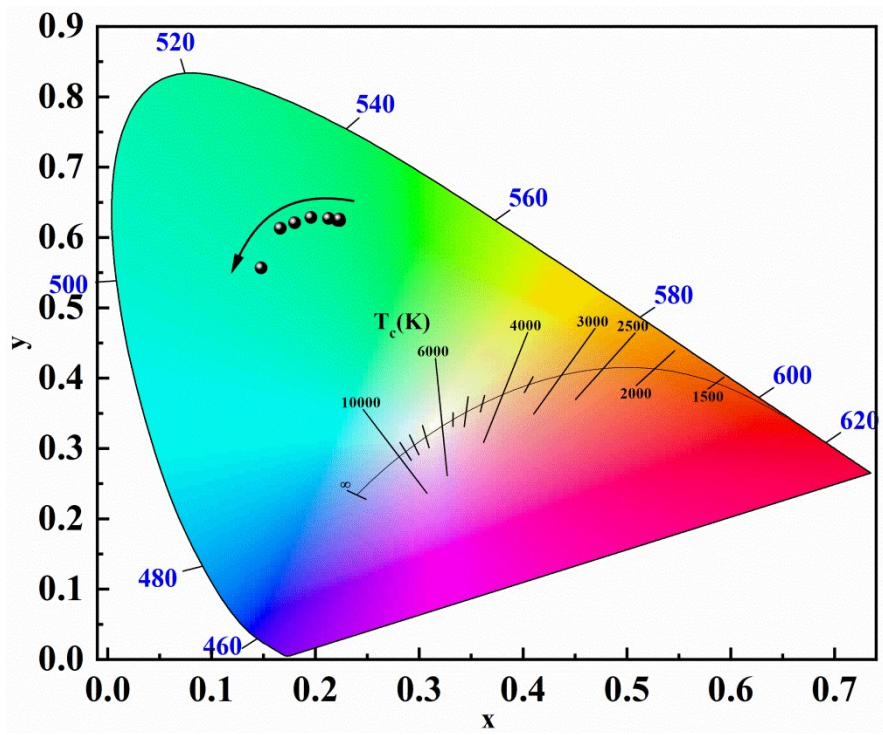

**Figure S9** CIE coordinates of the emission spectra of the ATUC solution.

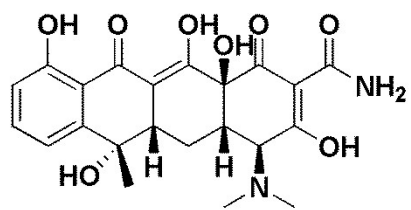

**Tetracycline**

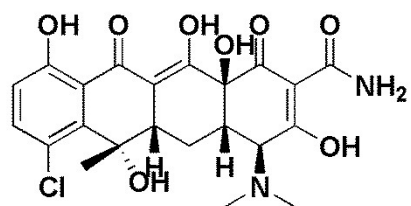

**Chlortetracycline**

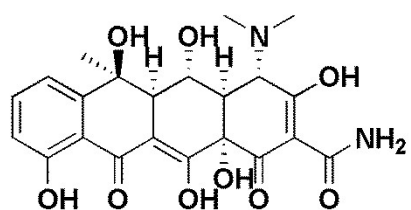

**Oxytetracycline**

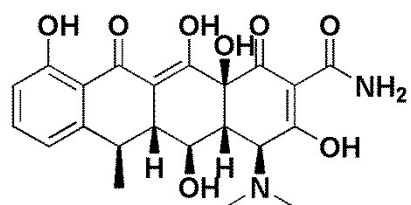

**Doxycycline**

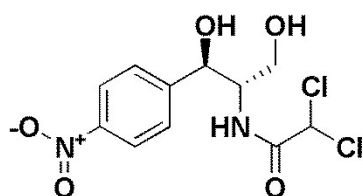

**Chloramphenicol**

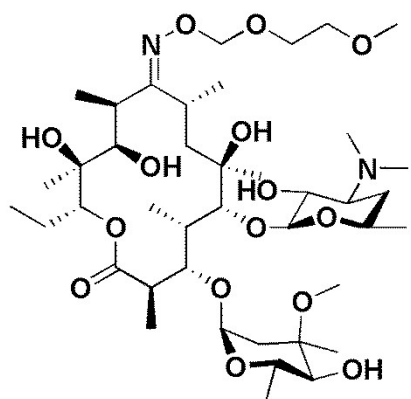

**Roxithromycin**

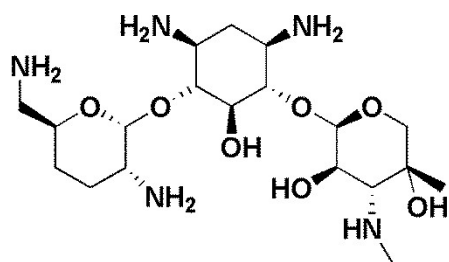

**Gentamicin**

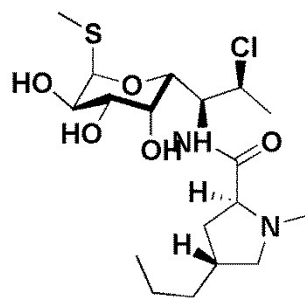

**Clindamycin**

**Figure S10** The structures of the several kinds of antibiotics.

**Table S1** A brief summary of various methods for detection of tetracycline antibiotics.

| Method          | Material used                                                    | Sample         | Linear range              | LOD                  | Measure time | Reference |
|-----------------|------------------------------------------------------------------|----------------|---------------------------|----------------------|--------------|-----------|
| HPLC            | -                                                                | milk           | -                         | 0.95~3.6 µg/L        | 20 min       | 1         |
| LC-MS/MS        | -                                                                | fish           | -                         | 12.53~19.01 µg/kg    | 20 min       | 2         |
| Colorimetric    | AuNCs-Aptamer                                                    | drug and milk  | 1~16 µM                   | 46 nM                | 1.5 h        | 3         |
| ECL             | RuSiNPs                                                          | drug           | 0.1~100 µM                | 0.23 µM              | -            | 4         |
| Electrochemical | PEC aptasensor<br>G/BiYWO <sub>6</sub> /Ce:CdS                   | Drug           | 1.0×10 <sup>-2</sup> µg/L | 0.01 ng/mL           | -            | 5         |
| CE              | -                                                                | tap water      | 0.03~5 µg/ mL             | 8.1~14.5 µg/L        | 2.6 min      | 6         |
| Fluorescent     | NH <sub>2</sub> -MIL-53(Al)                                      | milk           | 0~73 µM                   | 26.16 µM             | 30 s         | 7         |
| Fluorescent     | Silver nanoparticles<br>(AgNPs)                                  | drug           | 0.1~6.0 mg/L              | 1.4/0.43 nM          | -            | 8         |
| Fluorescent     | CdTe QD-SiO <sub>2</sub>                                         | milk and serum | 0~15 µM                   | 0.14 µM              | 4 h          | 9         |
| Fluorescent     | Eu-MOF                                                           | milk and beef  | 0~140 M                   | 39.8 µM              | 1 min        | 10        |
| Fluorescent     | Tb-MOF                                                           | water          | 0~50 µM                   | 1.95/2.77 nM         | 1 min        | 11        |
| Fluorescent     | Ag <sup>+</sup> /Tb <sup>3+</sup> @Uio-66<br>(COOH) <sub>2</sub> | milk and honey | 0.1~100 µM                | 11.4/20.6/9.1/9.6 nM | 6 min        | This work |

### Notes and references

1. H. Xu, H.-Y. Mi, M.-M. Guan, H.-Y. Shan, Q. Fei, Y.-F. Huan, Z.-Q. Zhang and G.-D. Feng, *Food Chem.*, 2017, **232**, 198-202.
2. L. R. Guidi, F. A. Santos, A. C. S. R. Ribeiro, C. Fernandes, L. H. M. Silva and M. B. A. Gloria, *Food Chem.*, 2018, **245**, 1232-1238.
3. Z. Zhang, Y. Tian, P. Huang and F.-Y. Wu, *Talanta*, 2020, **208**.
4. X. Chen, L. Zhao, X. Tian, S. Lian, Z. Huang and X. Chen, *Talanta*, 2014, **129**, 26-31.
5. Q. Han, R. Wang, B. Xing, H. Chi, D. Wu and Q. Wei, *Biosens. Bioelectron.*, 2018, **106**, 7-13.
6. X. Wu, Z. Xu, Z. Huang and C. Shao, *Electrophoresis*, 2016, **37**, 2963-2969.
7. C. Li, L. Zhu, W. Yang, X. He, S. Zhao, X. Zhang, W. Tang, J. Wang, T. Yue and Z. Li, *J. Agric. Food Chem.*, 2019, **67**, 1277-1283.
8. P. Wang, T.-H. Wu and Y. Zhang, *Talanta*, 2016, **146**, 175-180.
9. Y. Yang, H. Niu and H. Zhang, *ACS Appl. Mater. Interfaces*, 2016, **8**, 15741-15749.
10. Z. Gan, X. Hu, X. Xu, W. Zhang, X. Zou, J. Shi, K. Zheng and M. Arslan, *Food Chem.*, 2021, **354**.
11. C. Li, C. Zeng, Z. Chen, Y. Jiang, H. Yao, Y. Yang and W.-T. Wong, *J. Hazard. Mater.*, 2020, **384**.
